# Supplementary material for: Non-covalent synthesis of supermicelles with complex architectures using spatially confined hydrogen-bonding interactions
Source: PubMed Central journal article supplement (PMC4569713; doi:10.1038/ncomms9127), 2015-09-04
Supplement: ncomms9127-s1.pdf [file ncomms9127-s1.pdf]

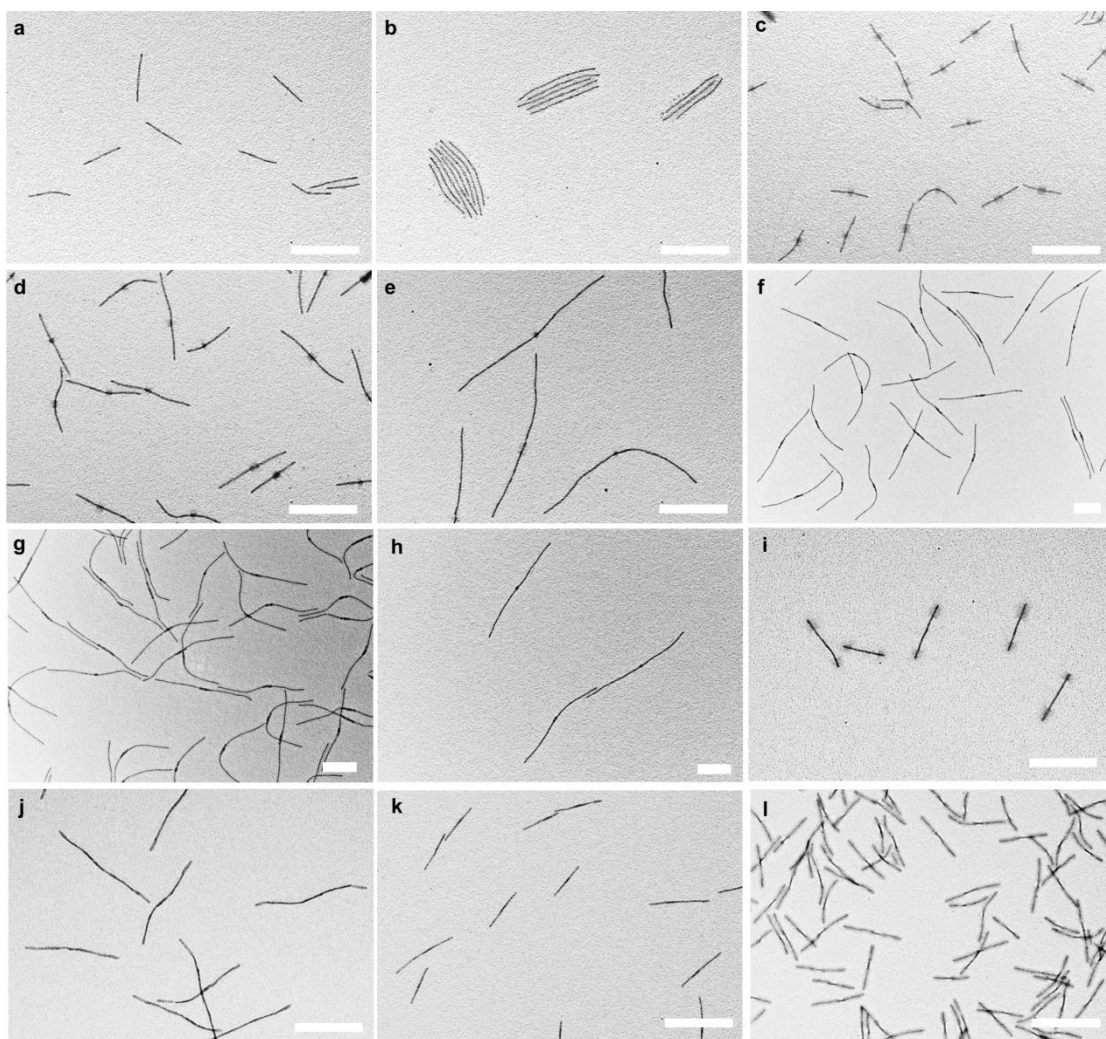

**Supplementary Figure 1| Supporting images for triblock comicelle building blocks.** TEM images (after solvent evaporation) of triblock comicelles **a**, N-H<sub>D</sub>-N (330 nm); **b**, N-H<sub>D</sub>-N (540 nm); **c**, N-H<sub>A</sub>-N (320 nm); **d**, N-H<sub>A</sub>-N (540 nm); **e**, N-H<sub>A</sub>-N (1.3 μm); **f**, N-H<sub>A</sub>-N (1.5 μm, middle H<sub>A</sub> segment length = 109 nm); **g**, N-H<sub>A</sub>-N (1.4 μm); **h**, N-H<sub>A</sub>-N (1.6 μm); **i**, H<sub>A</sub>-N-H<sub>A</sub> (380 nm); **j**, H<sub>D</sub>-N-H<sub>D</sub> (910 nm); **k**, H<sub>D</sub>-N-H<sub>D</sub> (480 nm); and **l**, H<sub>A</sub>-X-H<sub>A</sub> (420 nm) in *i*-PrOH. Scale bars are 500 nm. Segment H<sub>D</sub> = M(PFS<sub>20</sub>-*b*-PMVSOH<sub>120</sub>), N = M(PFS<sub>20</sub>-*b*-PtBA<sub>280</sub>), H<sub>A</sub> = M(PFS<sub>32</sub>-*b*-P2VP<sub>448</sub>) except that in **h**, H<sub>A</sub> = M(PFS<sub>25</sub>-*b*-P2VP<sub>250</sub>), X = M(PFS<sub>36</sub>-*b*-PMVS<sub>324</sub>).

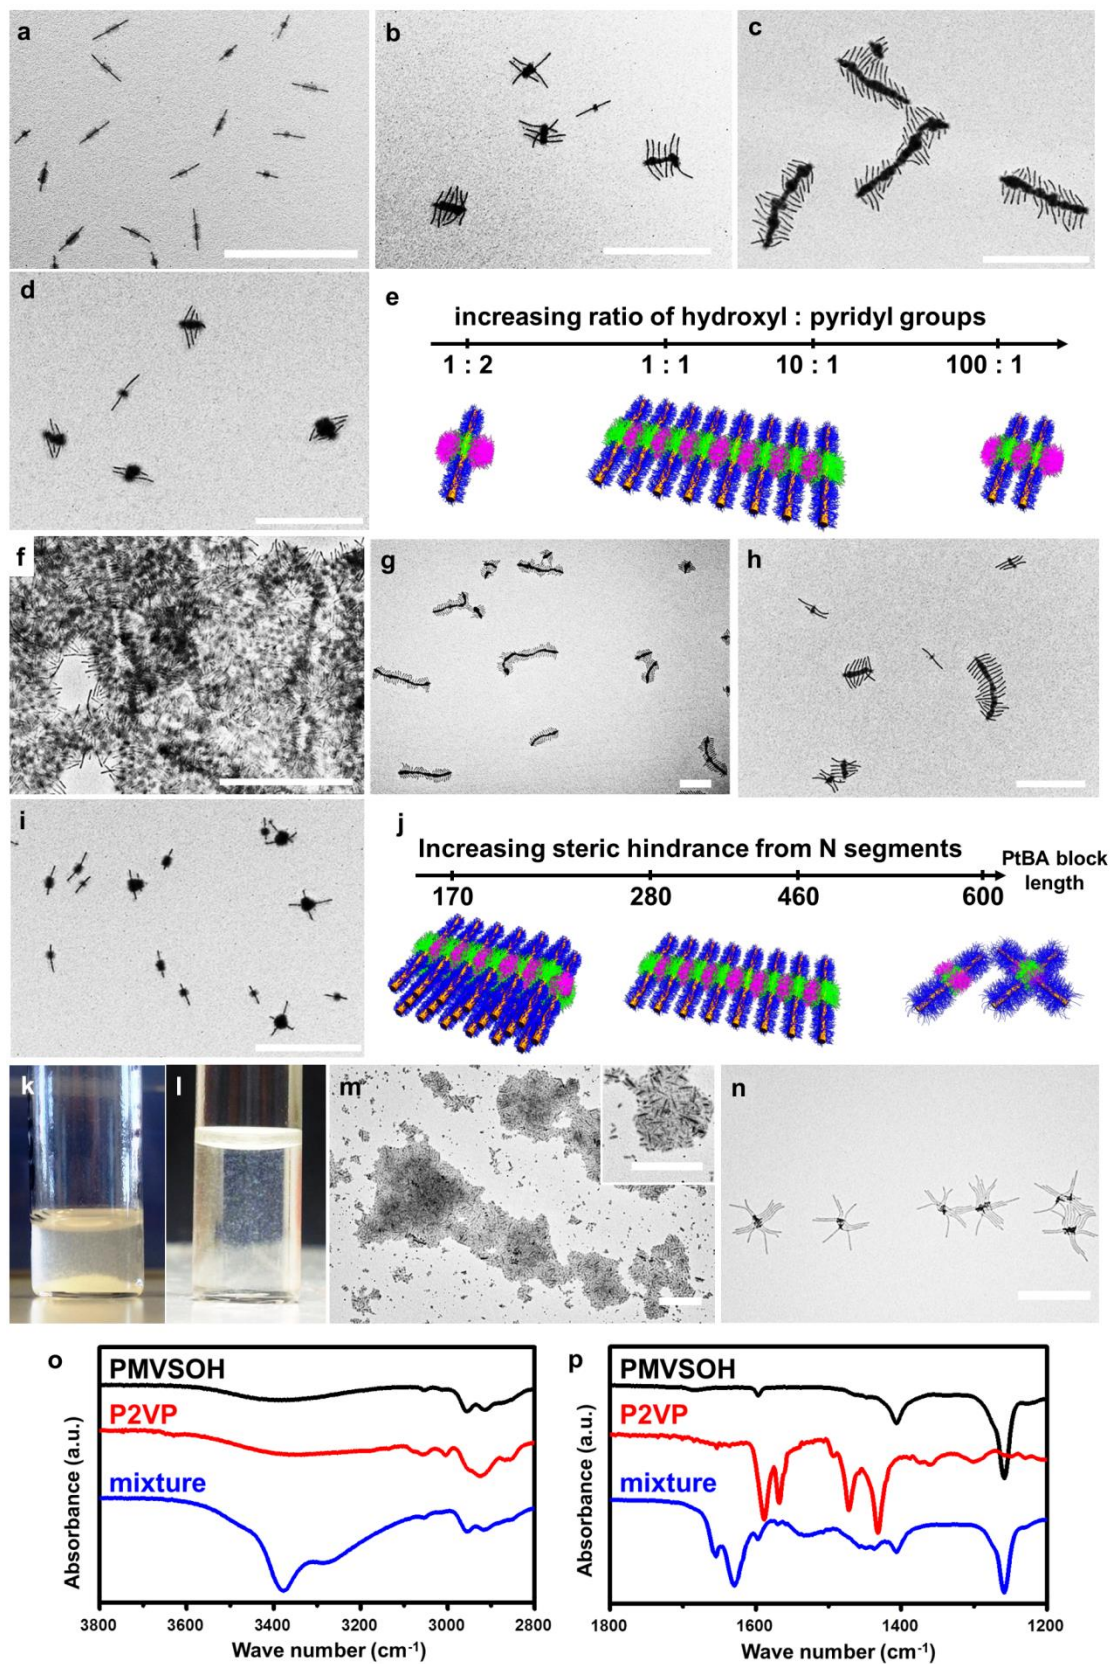

**Supplementary Figure 2 | Supporting images for the formation of supermicelles from H-bonding interactions.** Low resolution TEM image (after solvent evaporation) of supermicelles formed by mixing  $H_D$  ( $PMVSOH_{105}$ ) homopolymer with  $N-H_A-N$

triblock comicelles in *i*-PrOH at a ratio of hydroxyl : pyridyl groups of **a**, 1 : 2; **b**, 1 : 1; **c**, 10 : 1 and **d**, 100 : 1. **e**, Schematic illustration of the supermicelles formed by N-H<sub>A</sub>-N triblock comicelles with H<sub>D</sub> homopolymer with various ratios of hydroxyl : pyridyl groups. TEM images (after solvent evaporation) of H<sub>D</sub> homopolymer (PMVSOH<sub>105</sub>) and N-H<sub>A</sub>-N in *i*-PrOH with ratio of hydroxyl : pyridyl groups of 5 : 1, **f**, N = M(PFS<sub>20</sub>-*b*-PtBA<sub>170</sub>); **g**, N = M(PFS<sub>20</sub>-*b*-PtBA<sub>280</sub>); **h**, N = M(PFS<sub>32</sub>-*b*-PtBA<sub>460</sub>); **i**, N = M(PFS<sub>30</sub>-*b*-PtBA<sub>600</sub>). **j**, Schematic illustration of the supermicelles formed by N-H<sub>A</sub>-N triblock comicelles with different PFS-*b*-PtBA diblock copolymers. Photos of the solution of a mixture of **k**, H<sub>D</sub> homopolymer and H<sub>A</sub> seeds, and **l**, H<sub>D</sub> seeds and H<sub>A</sub> seeds, both with a mole ratio of hydroxyl : pyridyl groups of 1 : 1, 30 seconds after mixing in *i*-PrOH; **m**, TEM image of the aggregates formed in solution shown in **l** (inset is a zoom-in image of the aggregate). **n**, Low-resolution TEM image (after solvent evaporation) of supermicelles formed by mixing N-H<sub>A</sub>-N triblock comicelles in *i*-PrOH with H<sub>D</sub> short micelles with the ratio of hydroxyl : pyridyl groups = 1 : 2. **o** and **p**, FTIR spectra of the PMVSOH homopolymer, P2VP homopolymer and a mixture of PMVSOH and P2VP homopolymers (molar ratio of hydroxyl : pyridyl groups of 1 : 1). Scale bars are 1 μm and 500 nm in the inset. Segment H<sub>A</sub> = M(PFS<sub>32</sub>-*b*-P2VP<sub>448</sub>), N = M(PFS<sub>20</sub>-*b*-PtBA<sub>280</sub>) unless mentioned elsewhere.

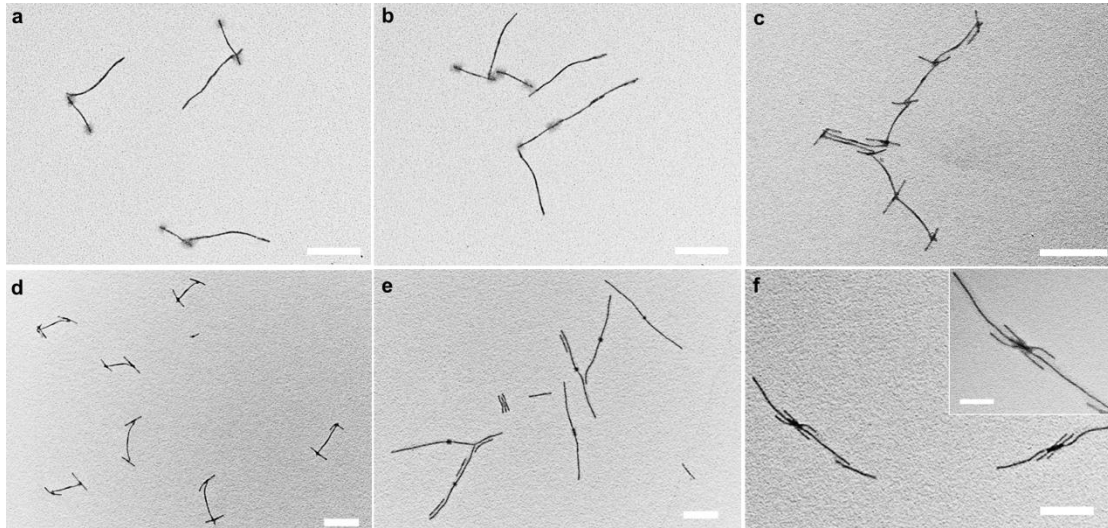

**Supplementary Figure 3 | Supporting images for the assembly of triblock comicelles via H-bonding.** TEM images after solvent evaporation of **a**, dimer and **b**, branched “condensation” supermicelles from triblock comicelles  $H_D-N-H_D$  (910 nm) and  $H_A-N-H_A$  (380 nm). **c**, “polymeric” supermicelles, and **d**, predominantly “T”-shaped supermicelles from  $H_D-N-H_D$  (480 nm) and  $N-H_A-N$  (320 nm) triblock comicelles with hydroxyl : pyridyl groups ratios of 3 : 1 and 3.3 : 1, respectively. **e**, the mixture of  $N-H_D-N$  (330 nm), and triblock comicelles  $N-H_A-N$  (total length 1.6  $\mu\text{m}$ , where the corona-forming P2VP block of the central  $H_A$  segment is shorter, see below) triblock comicelles; **f**, the assembled structure of  $N-H_D-N$  triblock comicelles (total length 330 nm), and  $N-H_A-N$  triblock comicelles (total length 1.5  $\mu\text{m}$ , middle block  $H_A$  length 109 nm). All these structures were obtained in *i*-PrOH. Scale bars are 500 nm and that for inset is 200 nm. Segment  $H_D = M(\text{PFS}_{20}\text{-}b\text{-PMVSOH}_{120})$ ,  $N = M(\text{PFS}_{20}\text{-}b\text{-PtBA}_{280})$ ,  $H_A = M(\text{PFS}_{32}\text{-}b\text{-P2VP}_{448})$  except that in **e**,  $H_A = M(\text{PFS}_{25}\text{-}b\text{-P2VP}_{250})$ .

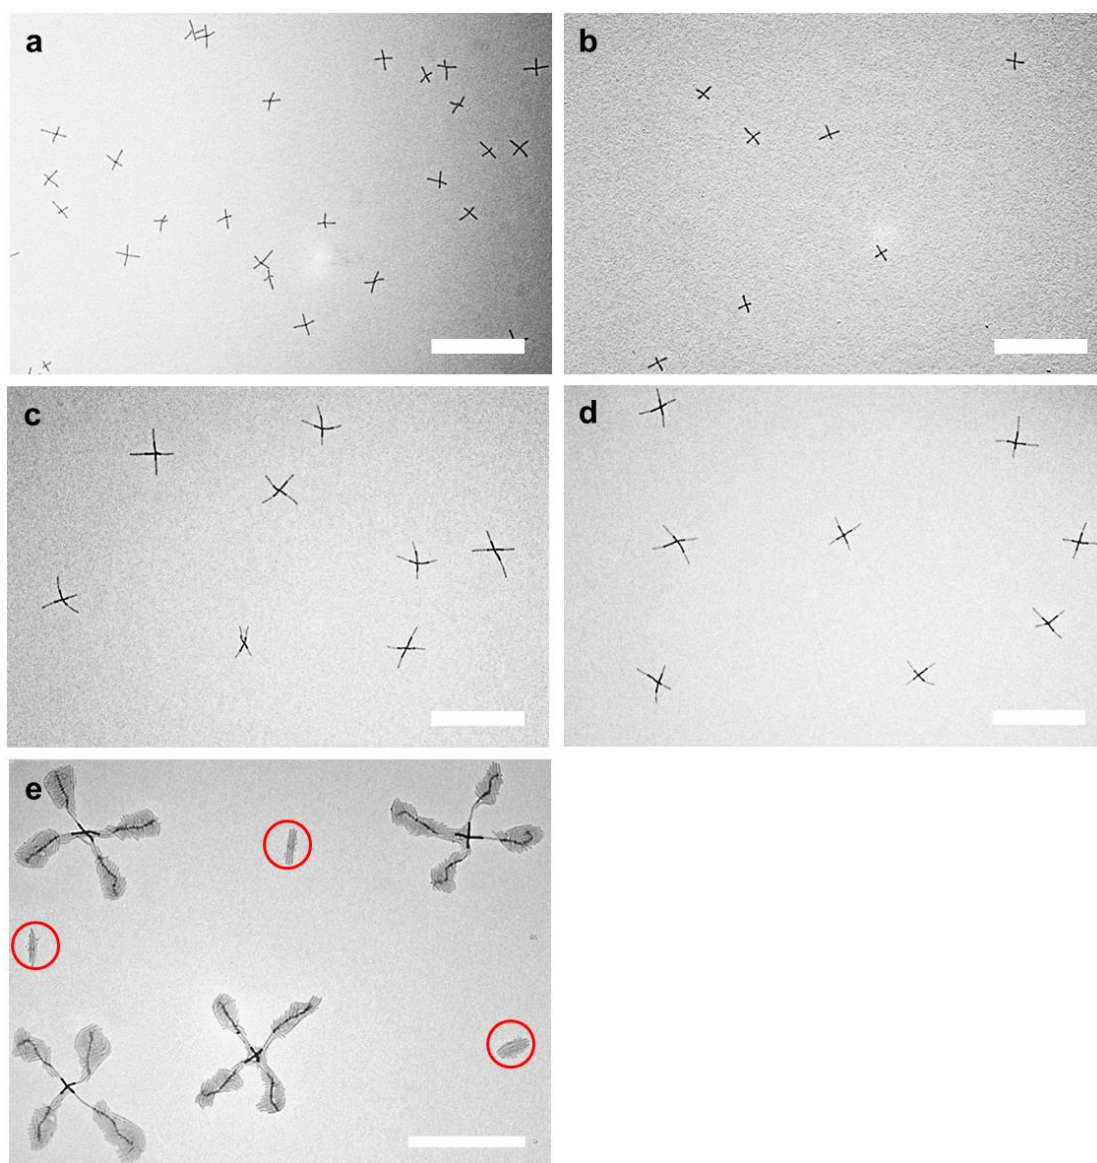

**Supplementary Figure 4| Supporting images for the formation of “windmill” supermicelles by hierarchical assembly.** Low-resolution TEM images (after solvent evaporation) of the **a**, “cross” supermicelles from the  $H_A$ -X- $H_A$  (420 nm) triblock comicelles in MeOH; and the “cross” supermicelles **b**, with crosslinked the X segment ( $^{XL}X$ ); **c**, after the addition of N segments; **d**, with crosslinked  $^{XL}H_A$  segments. **e**, Low-resolution TEM images of the “windmill” supermicelles. Structures marked by the red circles are bundles of individual N- $H_D$ -N triblock comicelles resulting from the  $H_D$  seeds that did not become attached to the composite “cross” supermicelles, as shown in Fig. 3f and 3h. All these structures were obtained in *i*-PrOH except the sample shown in image a. Scale bars are 2  $\mu$ m. Segment  $H_D$  = M(PFS<sub>20</sub>-*b*-PMVSOH<sub>120</sub>), N = M(PFS<sub>20</sub>-*b*-PtBA<sub>280</sub>),  $H_A$  = M(PFS<sub>25</sub>-*b*-P2VP<sub>250</sub>).

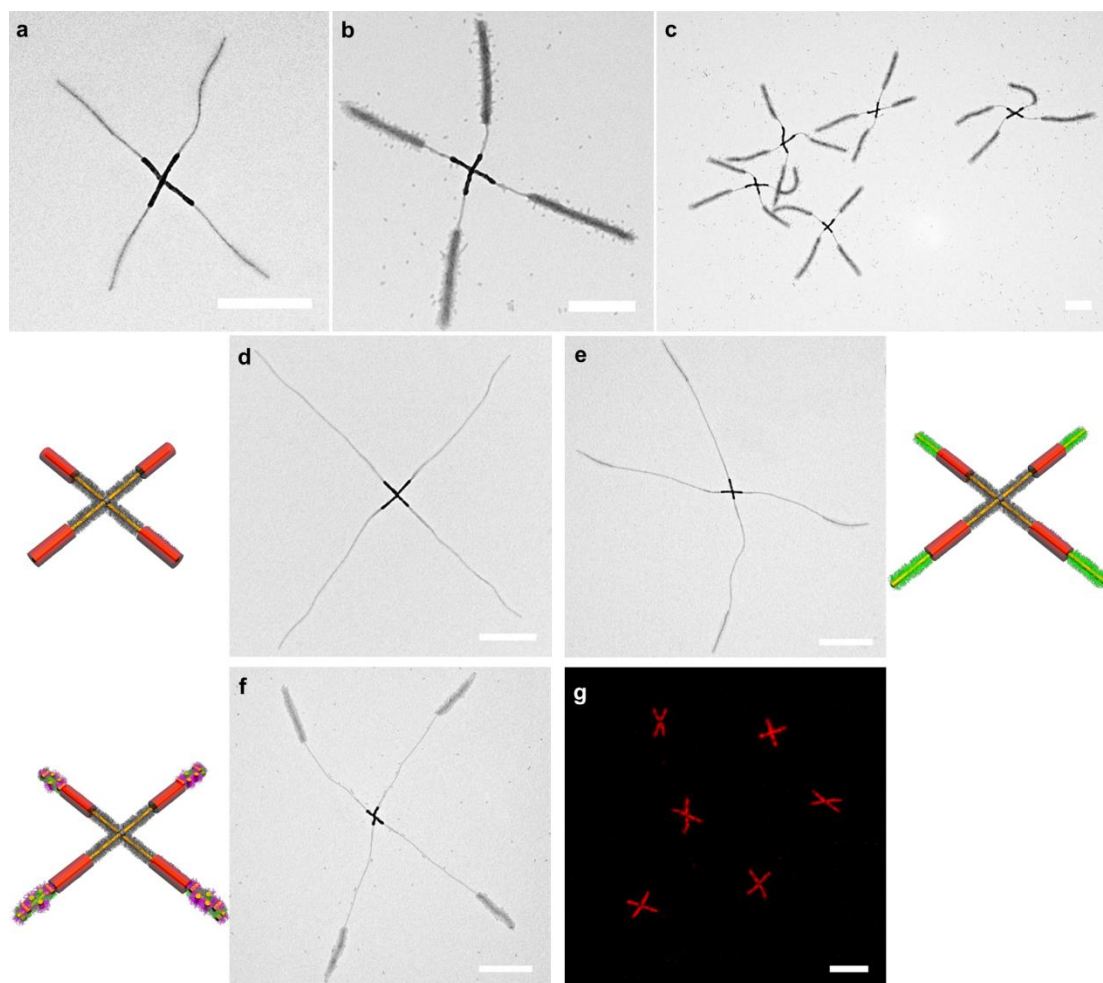

**Supplementary Figure 5 | Supporting images for the formation of “cross” supermicelles.** TEM images of the crosslinked “cross” supermicelles **a**, after the sequential growth of N segments and  $H_A$  segments; **b**, after the addition of  $H_D$  short micelles (composite “cross” supermicelles). **c**, low-resolution TEM image of the composite “cross” supermicelles. TEM images and their corresponding schematic illustrations of the “cross” supermicelles **d**, with  $^{XL}X$  and  $^{XL}H_A$  segments and after the addition of N-red segments (PFS<sub>20</sub>-*b*-PtBA<sub>280</sub>, end-labeled with the red-dye BODIPY 630/650); **e**, after the addition of another  $H_A$  segment; **f**, after the further addition of  $H_D$  short micelles (composite “cross” supermicelles). All these TEM images were obtained after the evaporation of solvent (*i*-PrOH). **g**, LSCM image of the composite “cross” supermicelles in *i*-PrOH. Scale bars are 500 nm in **a-c**, 1  $\mu$ m in **d-f** and 5  $\mu$ m in **g**. Segment X = M(PFS<sub>36</sub>-*b*-PMVS<sub>324</sub>),  $H_D$  = M(PFS<sub>20</sub>-*b*-PMVSOH<sub>120</sub>), N = M(PFS<sub>20</sub>-*b*-PtBA<sub>280</sub>),  $H_A$  = M(PFS<sub>32</sub>-*b*-P2VP<sub>448</sub>),  $^{XL}H_A$  =  $^{XL}M$ (PFS<sub>25</sub>-*b*-P2VP<sub>250</sub>).

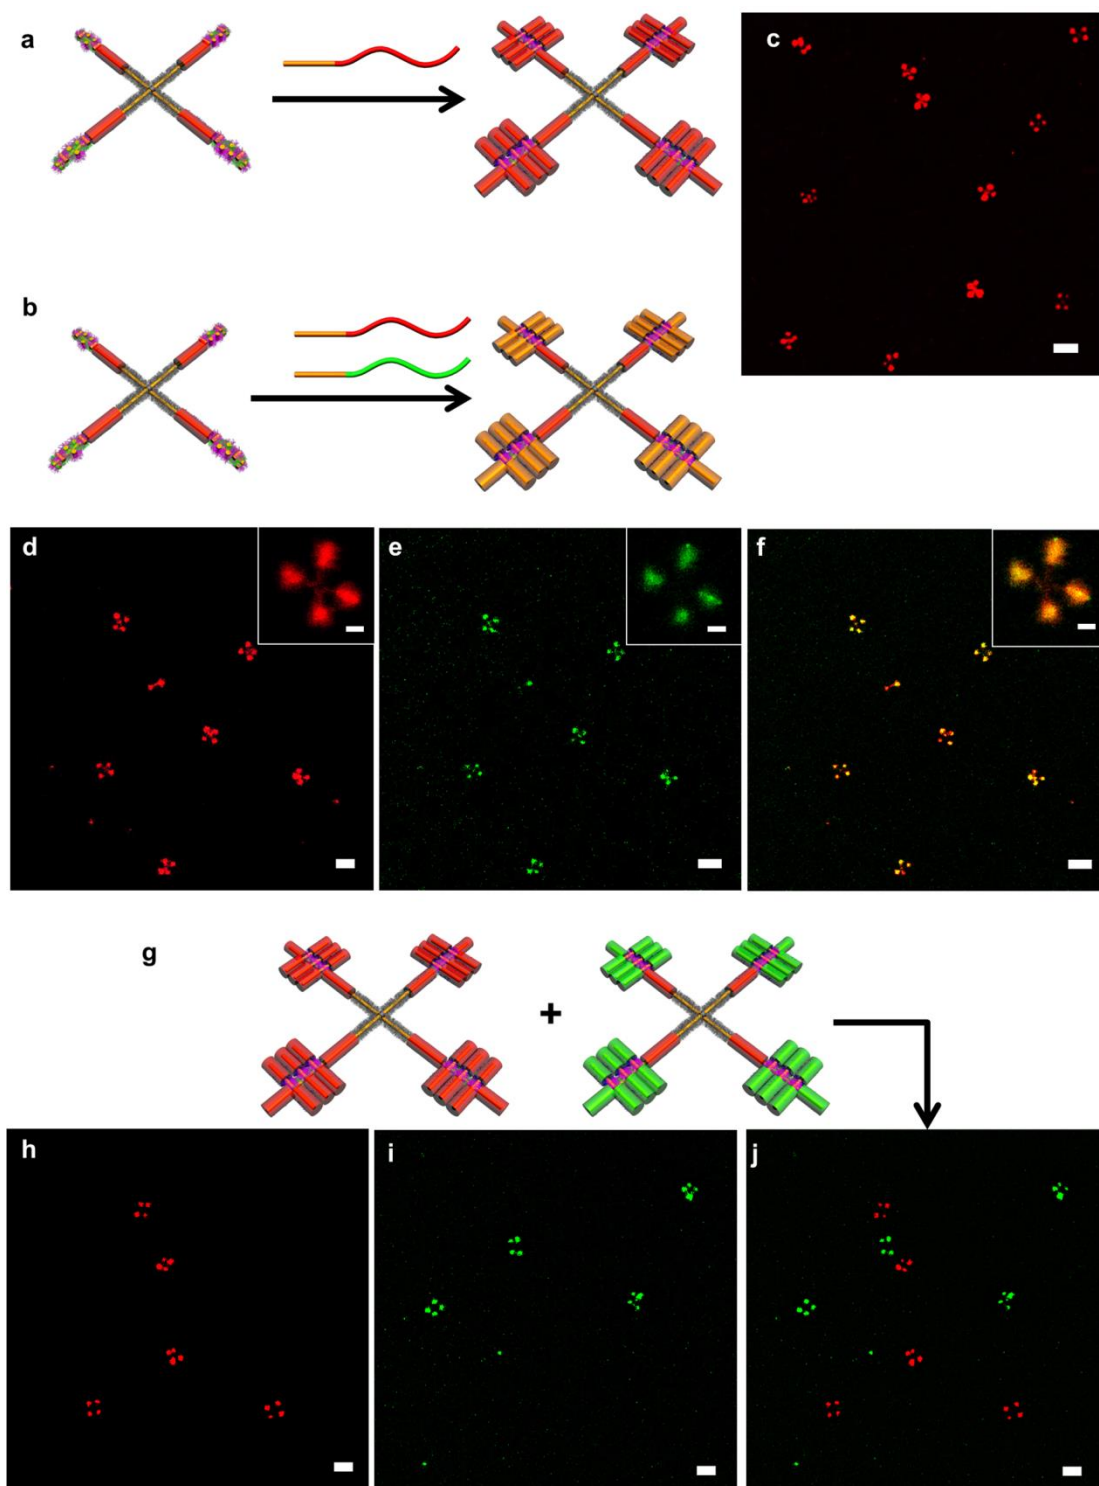

**Supplementary Figure 6 | Supporting images for fluorescent “windmill”-shaped supermicelles.** **a**, schematic illustration of assembly process of “windmill”-shaped supermicelles labeled with red dye, by adding PFS<sub>20</sub>-*b*-PtBA<sub>280</sub>-red (end-labeled with the red-dye BODIPY 630/650) to composite “cross” supermicelles shown in Supplementary Fig. 5f. **b**, schematic illustration of assembly process for “windmill”-shaped supermicelles labeled with a mixture of red and green dyes, via a similar process but adding a mixture of PFS<sub>20</sub>-*b*-PtBA<sub>280</sub>-red and PFS<sub>20</sub>-*b*-PtBA<sub>280</sub>-green (end-labeled with the green-dye BODIPY FL) with a mole

ratio of 1 : 1. **c**, LSCM image of the “windmill”- shaped supermicelles labeled with red dye. **d-f**, LSCM images of the “windmill”- shaped supermicelles labeled with a mixture of red and green dyes in **d**, red channel, **e**, green channel and **f**, merge channel. **g**, schematic illustration and LSCM images of the mixture of “windmill”- shaped supermicelles labeled with red or green dyes, and **h-j**, LSCM images of this supermicelle mixture (10 days after mixing) : **h**, red channel, **i**, green channel and **j**, merge channel. Inset images in d-f are the high-resolution LSCM images of the “windmill”- shaped supermicelles labeled with a mixture of red and green dyes. All these structures were obtained and characterized in *i*-PrOH. Scale bars are 5  $\mu\text{m}$  in LSCM images and 1  $\mu\text{m}$  in the insets.



**Supplementary Table 1** | Characteristics of the seed cylinders and the triblock comicelles grown from the seed cylinders.<sup>a</sup>

| Segment label and corresponding unimer <sup>b</sup>                                                                                                                                                                                     | central segment length ( $L_n$ , nm) | $L_w$ (nm) | $L_n$ (nm) | $L_w/L_n$ <sup>c</sup> | $\sigma$ <sup>c</sup> (nm) |
|-----------------------------------------------------------------------------------------------------------------------------------------------------------------------------------------------------------------------------------------|--------------------------------------|------------|------------|------------------------|----------------------------|
| X, PFS <sub>36</sub> - <i>b</i> -PMVS <sub>324</sub> (20 nm)                                                                                                                                                                            | -                                    | 23         | 20         | 1.16                   | 8                          |
| H <sub>A</sub> , PFS <sub>32</sub> - <i>b</i> -P2VP <sub>448</sub> (45 nm)                                                                                                                                                              | -                                    | 51         | 45         | 1.12                   | 16                         |
| H <sub>A</sub> , PFS <sub>32</sub> - <i>b</i> -P2VP <sub>448</sub> (109 nm)                                                                                                                                                             | -                                    | 122        | 109        | 1.12                   | 38                         |
| H <sub>A</sub> , PFS <sub>32</sub> - <i>b</i> -P2VP <sub>448</sub> (160 nm)                                                                                                                                                             | -                                    | 179        | 160        | 1.12                   | 55                         |
| H <sub>A</sub> , PFS <sub>25</sub> - <i>b</i> -P2VP <sub>250</sub> (55 nm)                                                                                                                                                              | -                                    | 63         | 55         | 1.16                   | 22                         |
| H <sub>D</sub> , PFS <sub>20</sub> - <i>b</i> -PMVSOH <sub>120</sub> (37 nm)                                                                                                                                                            | -                                    | 43         | 37         | 1.14                   | 14                         |
| N, PFS <sub>20</sub> - <i>b</i> -PtBA <sub>280</sub> (240 nm)                                                                                                                                                                           | -                                    | 280        | 240        | 1.16                   | 96                         |
| N, PFS <sub>20</sub> - <i>b</i> -PtBA <sub>280</sub> (370 nm)                                                                                                                                                                           | -                                    | 425        | 370        | 1.15                   | 143                        |
| N, PFS <sub>20</sub> - <i>b</i> -PtBA <sub>280</sub> (680 nm)                                                                                                                                                                           | -                                    | 750        | 680        | 1.11                   | 225                        |
| N-H <sub>D</sub> -N, M(PFS <sub>20</sub> - <i>b</i> -PtBA <sub>280</sub> )- <i>b</i> -M(PFS <sub>20</sub> - <i>b</i> -PMVSOH <sub>120</sub> )- <i>b</i> -M(PFS <sub>20</sub> - <i>b</i> -PtBA <sub>280</sub> ) (330 nm)                 | 37                                   | 335        | 330        | 1.02                   | 45                         |
| N-H <sub>D</sub> -N, M(PFS <sub>20</sub> - <i>b</i> -PtBA <sub>280</sub> )- <i>b</i> -M(PFS <sub>20</sub> - <i>b</i> -PMVSOH <sub>120</sub> )- <i>b</i> -M(PFS <sub>20</sub> - <i>b</i> -PtBA <sub>280</sub> ) (540 nm)                 | 37                                   | 545        | 540        | 1.01                   | 55                         |
| N-H <sub>A</sub> -N, M(PFS <sub>20</sub> - <i>b</i> -PtBA <sub>280</sub> )- <i>b</i> -M(PFS <sub>32</sub> - <i>b</i> -P2VP <sub>448</sub> )- <i>b</i> -M(PFS <sub>20</sub> - <i>b</i> -PtBA <sub>280</sub> ) (320 nm)                   | 45                                   | 330        | 320        | 1.03                   | 58                         |
| N-H <sub>A</sub> -N, M(PFS <sub>20</sub> - <i>b</i> -PtBA <sub>280</sub> )- <i>b</i> -M(PFS <sub>32</sub> - <i>b</i> -P2VP <sub>448</sub> )- <i>b</i> -M(PFS <sub>20</sub> - <i>b</i> -PtBA <sub>280</sub> ) (540 nm)                   | 45                                   | 560        | 540        | 1.03                   | 94                         |
| N-H <sub>A</sub> -N, M(PFS <sub>20</sub> - <i>b</i> -PtBA <sub>280</sub> )- <i>b</i> -M(PFS <sub>32</sub> - <i>b</i> -P2VP <sub>448</sub> )- <i>b</i> -M(PFS <sub>20</sub> - <i>b</i> -PtBA <sub>280</sub> ) (1.3 μm)                   | 45                                   | 1285       | 1270       | 1.01                   | 127                        |
| N-H <sub>A</sub> -N, M(PFS <sub>20</sub> - <i>b</i> -PtBA <sub>280</sub> )- <i>b</i> -M(PFS <sub>32</sub> - <i>b</i> -P2VP <sub>448</sub> )- <i>b</i> -M(PFS <sub>20</sub> - <i>b</i> -PtBA <sub>280</sub> ) (1.5 μm)                   | 109                                  | 1550       | 1450       | 1.04                   | 290                        |
| N-H <sub>A</sub> -N, M(PFS <sub>20</sub> - <i>b</i> -PtBA <sub>280</sub> )- <i>b</i> -M(PFS <sub>32</sub> - <i>b</i> -P2VP <sub>448</sub> )- <i>b</i> -M(PFS <sub>20</sub> - <i>b</i> -PtBA <sub>280</sub> ) (1.4 μm)                   | 160                                  | 1430       | 1390       | 1.03                   | 241                        |
| N-H <sub>A</sub> -N, M(PFS <sub>20</sub> - <i>b</i> -PtBA <sub>280</sub> )- <i>b</i> -M(PFS <sub>25</sub> - <i>b</i> -P2VP <sub>250</sub> )- <i>b</i> -M(PFS <sub>20</sub> - <i>b</i> -PtBA <sub>280</sub> ) (1.6 μm)                   | 55                                   | 1610       | 1590       | 1.01                   | 159                        |
| H <sub>A</sub> -N-H <sub>A</sub> , M(PFS <sub>32</sub> - <i>b</i> -P2VP <sub>448</sub> )- <i>b</i> -M(PFS <sub>20</sub> - <i>b</i> -PtBA <sub>280</sub> )- <i>b</i> -M(PFS <sub>32</sub> - <i>b</i> -P2VP <sub>448</sub> ) (380 nm)     | 240                                  | 410        | 380        | 1.06                   | 93                         |
| H <sub>D</sub> -N-H <sub>D</sub> , M(PFS <sub>20</sub> - <i>b</i> -PMVSOH <sub>120</sub> )- <i>b</i> -M(PFS <sub>20</sub> - <i>b</i> -PtBA <sub>280</sub> )- <i>b</i> -M(PFS <sub>20</sub> - <i>b</i> -PMVSOH <sub>120</sub> ) (910 nm) | 680                                  | 950        | 910        | 1.05                   | 203                        |
| H <sub>D</sub> -N-H <sub>D</sub> , M(PFS <sub>20</sub> - <i>b</i> -PMVSOH <sub>120</sub> )- <i>b</i> -M(PFS <sub>20</sub> - <i>b</i> -PtBA <sub>280</sub> )- <i>b</i> -M(PFS <sub>20</sub> - <i>b</i> -PMVSOH <sub>120</sub> ) (480 nm) | 370                                  | 505        | 480        | 1.09                   | 144                        |
| H <sub>A</sub> -X-H <sub>A</sub> , M(PFS <sub>25</sub> - <i>b</i> -P2VP <sub>250</sub> )- <i>b</i> -M(PFS <sub>36</sub> - <i>b</i> -PMVS <sub>324</sub> )- <i>b</i> -M(PFS <sub>25</sub> - <i>b</i> -P2VP <sub>250</sub> ) (420 nm)     | 20                                   | 450        | 420        | 1.07                   | 111                        |

a: the lengths of the cylinders were measured from their TEM images and the values were obtained by averaging over 100 readings; b: values in parentheses represent the total length ( $L_n$ ) of the cylindrical micelles or block comicelles; c:  $L_n$ ,  $L_w$  and  $\sigma$  are the number average micelle length, weight average micelle length, and the standard deviation of the micelle length distribution, respectively, as calculated from the histograms of the length distributions.
